# Supplementary material for: Prevalence of early childhood caries, risk factors and nutritional status among 3-5-year-old preschool children in Kisarawe, Tanzania
Source: PubMed Central journal article supplement (PMC7906390; doi:10.1371/journal.pone.0247240), 2021-02-25
Supplement: pone.0247240.s002.pdf [file pone.0247240.s002.pdf]

# PLOS ONE

## Prevalence of early childhood caries, risk factors and nutritional status among 3-5-year-old preschool children in Kisarawe, Tanzania

--Manuscript Draft--

|                                                                                                                               |                                                                                                                                                                                                                                                                                                                                                                                                                                                                                                                                                                                                                                                                                                                                                                                                                                                                                                                                                                                                                                                                                                                                                                                                                                                                                                                                                                                                                                                                                                                                                                                                                                                                                                                                                                                                                                                                                                                                                                                                                                                                                                                                                                                                                                                                    |
|-------------------------------------------------------------------------------------------------------------------------------|--------------------------------------------------------------------------------------------------------------------------------------------------------------------------------------------------------------------------------------------------------------------------------------------------------------------------------------------------------------------------------------------------------------------------------------------------------------------------------------------------------------------------------------------------------------------------------------------------------------------------------------------------------------------------------------------------------------------------------------------------------------------------------------------------------------------------------------------------------------------------------------------------------------------------------------------------------------------------------------------------------------------------------------------------------------------------------------------------------------------------------------------------------------------------------------------------------------------------------------------------------------------------------------------------------------------------------------------------------------------------------------------------------------------------------------------------------------------------------------------------------------------------------------------------------------------------------------------------------------------------------------------------------------------------------------------------------------------------------------------------------------------------------------------------------------------------------------------------------------------------------------------------------------------------------------------------------------------------------------------------------------------------------------------------------------------------------------------------------------------------------------------------------------------------------------------------------------------------------------------------------------------|
| <b>Manuscript Number:</b>                                                                                                     | PONE-D-20-31062                                                                                                                                                                                                                                                                                                                                                                                                                                                                                                                                                                                                                                                                                                                                                                                                                                                                                                                                                                                                                                                                                                                                                                                                                                                                                                                                                                                                                                                                                                                                                                                                                                                                                                                                                                                                                                                                                                                                                                                                                                                                                                                                                                                                                                                    |
| <b>Article Type:</b>                                                                                                          | Research Article                                                                                                                                                                                                                                                                                                                                                                                                                                                                                                                                                                                                                                                                                                                                                                                                                                                                                                                                                                                                                                                                                                                                                                                                                                                                                                                                                                                                                                                                                                                                                                                                                                                                                                                                                                                                                                                                                                                                                                                                                                                                                                                                                                                                                                                   |
| <b>Full Title:</b>                                                                                                            | Prevalence of early childhood caries, risk factors and nutritional status among 3-5-year-old preschool children in Kisarawe, Tanzania                                                                                                                                                                                                                                                                                                                                                                                                                                                                                                                                                                                                                                                                                                                                                                                                                                                                                                                                                                                                                                                                                                                                                                                                                                                                                                                                                                                                                                                                                                                                                                                                                                                                                                                                                                                                                                                                                                                                                                                                                                                                                                                              |
| <b>Short Title:</b>                                                                                                           | Early childhood caries, risk factors and nutritional status of preschool children, Tanzania                                                                                                                                                                                                                                                                                                                                                                                                                                                                                                                                                                                                                                                                                                                                                                                                                                                                                                                                                                                                                                                                                                                                                                                                                                                                                                                                                                                                                                                                                                                                                                                                                                                                                                                                                                                                                                                                                                                                                                                                                                                                                                                                                                        |
| <b>Corresponding Author:</b>                                                                                                  | LORNA CELIA CARNEIRO, PhD<br>Muhimbili University College of Health Sciences: Muhimbili University of Health and Allied Sciences<br>Dar es Salaam, TANZANIA, UNITED REPUBLIC OF                                                                                                                                                                                                                                                                                                                                                                                                                                                                                                                                                                                                                                                                                                                                                                                                                                                                                                                                                                                                                                                                                                                                                                                                                                                                                                                                                                                                                                                                                                                                                                                                                                                                                                                                                                                                                                                                                                                                                                                                                                                                                    |
| <b>Keywords:</b>                                                                                                              | Early Childhood Caries, nutritional status, risk factors, sugar exposure and oral hygiene, Tanzania                                                                                                                                                                                                                                                                                                                                                                                                                                                                                                                                                                                                                                                                                                                                                                                                                                                                                                                                                                                                                                                                                                                                                                                                                                                                                                                                                                                                                                                                                                                                                                                                                                                                                                                                                                                                                                                                                                                                                                                                                                                                                                                                                                |
| <b>Abstract:</b>                                                                                                              | <p><b>Background:</b> Early childhood dental caries (ECC) is a serious public health problem. Correlation of prevalence of ECC with risk factors and anthropometric measures will shed evidence on the link between ECC and children's anthropometric and nutritional status. The data available from Tanzania rural population regarding ECC are scarce; therefore, this study aims to assess the prevalence of ECC, risk factors and nutritional status among 3-5-year-old preschool children in Kisarawe, Tanzania and to assess its correlation with the form, visible plaque scores in upper anterior teeth, total sugar exposure, anthropometric measures, and socio demographic attributes.</p> <p><b>Methods:</b> This cross-sectional study was conducted on 831 preschool children registered in public preschools in Kisarawe District. ECC was assessed using the WHO (2013) criteria, and anthropometric measures using the WHO Child Growth Standards (2006). Structured questionnaires were completed by children's parents through an interview. Collected information on socio-demographic attributes including oral hygiene and sugar exposure to their children was analyzed.</p> <p><b>Results:</b> Only 459 children (55.2%) were recognized as caries-free. The children's mean dmft index was 2.51. Children with visible plaque were the majority (56.1%). The dmft score index was negatively and significantly associated with weight-for-age z-score [Coefficient: -0.11 (95% CI: -0.76, -0.11)] and, positively significant associated with visible plaque score index [Coefficient: 0.16 (95% CI: 0.18, 0.52)] and total sugar exposure [Coefficient: 0.19 (95% CI: 0.15, 0.38)] in the adjusted model. The prevalence of underweight was [4.2% (3.0- 5.8 95% CI)] and severe underweight was [0.2% (0.1- 0.9 95% CI)] while prevalence of stunting was [1.6% (0.9- 2.7 95% CI)] and severe stunting was [0.4% (0.1- 1.1 95% CI)].</p> <p><b>Conclusion:</b> This study demonstrated a significantly negative relationship between ECC and children anthropometric measures indicated by weight-for-age, and positive relationship with sugar exposure and poor oral hygiene indicated by visible plaque on upper anterior teeth.</p> |
| <b>Order of Authors:</b>                                                                                                      | LORNA CELIA CARNEIRO, PhD<br>Tumaini Simon Ndekero<br>Ray M Masumo                                                                                                                                                                                                                                                                                                                                                                                                                                                                                                                                                                                                                                                                                                                                                                                                                                                                                                                                                                                                                                                                                                                                                                                                                                                                                                                                                                                                                                                                                                                                                                                                                                                                                                                                                                                                                                                                                                                                                                                                                                                                                                                                                                                                 |
| <b>Additional Information:</b>                                                                                                |                                                                                                                                                                                                                                                                                                                                                                                                                                                                                                                                                                                                                                                                                                                                                                                                                                                                                                                                                                                                                                                                                                                                                                                                                                                                                                                                                                                                                                                                                                                                                                                                                                                                                                                                                                                                                                                                                                                                                                                                                                                                                                                                                                                                                                                                    |
| <b>Question</b>                                                                                                               | <b>Response</b>                                                                                                                                                                                                                                                                                                                                                                                                                                                                                                                                                                                                                                                                                                                                                                                                                                                                                                                                                                                                                                                                                                                                                                                                                                                                                                                                                                                                                                                                                                                                                                                                                                                                                                                                                                                                                                                                                                                                                                                                                                                                                                                                                                                                                                                    |
| <b>Financial Disclosure</b>                                                                                                   | The funders had no role in study design, data collection and analysis, decision to publish, or preparation of the manuscript.                                                                                                                                                                                                                                                                                                                                                                                                                                                                                                                                                                                                                                                                                                                                                                                                                                                                                                                                                                                                                                                                                                                                                                                                                                                                                                                                                                                                                                                                                                                                                                                                                                                                                                                                                                                                                                                                                                                                                                                                                                                                                                                                      |
| Enter a financial disclosure statement that describes the sources of funding for the work included in this submission. Review |                                                                                                                                                                                                                                                                                                                                                                                                                                                                                                                                                                                                                                                                                                                                                                                                                                                                                                                                                                                                                                                                                                                                                                                                                                                                                                                                                                                                                                                                                                                                                                                                                                                                                                                                                                                                                                                                                                                                                                                                                                                                                                                                                                                                                                                                    |

the [submission guidelines](#) for detailed requirements. View published research articles from [PLOS ONE](#) for specific examples.

This statement is required for submission and **will appear in the published article** if the submission is accepted. Please make sure it is accurate.

#### Unfunded studies

Enter: *The author(s) received no specific funding for this work.*

#### Funded studies

Enter a statement with the following details:

- Initials of the authors who received each award
- Grant numbers awarded to each author
- The full name of each funder
- URL of each funder website
- Did the sponsors or funders play any role in the study design, data collection and analysis, decision to publish, or preparation of the manuscript?
- **NO** - Include this sentence at the end of your statement: *The funders had no role in study design, data collection and analysis, decision to publish, or preparation of the manuscript.*
- **YES** - Specify the role(s) played.

\* typeset

#### Competing Interests

Use the instructions below to enter a competing interest statement for this submission. On behalf of all authors, disclose any [competing interests](#) that could be perceived to bias this work—acknowledging all financial support and any other relevant financial or non-financial competing interests.

This statement **will appear in the published article** if the submission is accepted. Please make sure it is accurate. View published research articles from [PLOS ONE](#) for specific examples.

The authors have declared that no competing interests exist.

**NO authors have competing interests**

Enter: *The authors have declared that no competing interests exist.*

**Authors with competing interests**

Enter competing interest details beginning with this statement:

*I have read the journal's policy and the authors of this manuscript have the following competing interests: [insert competing interests here]*

\* typeset

**Ethics Statement**

Enter an ethics statement for this submission. This statement is required if the study involved:

- Human participants
- Human specimens or tissue
- Vertebrate animals or cephalopods
- Vertebrate embryos or tissues
- Field research

Write "N/A" if the submission does not require an ethics statement.

General guidance is provided below. Consult the [submission guidelines](#) for detailed instructions. **Make sure that all information entered here is included in the Methods section of the manuscript.**

Approval of the study was granted by the Senate Research and Publication Committee of the Muhimbili University of Health and Allied Sciences - (Ref. No. DA282/298/01.C) written consent was obtained from parents of children

**Format for specific study types**

**Human Subject Research (involving human participants and/or tissue)**

- Give the name of the institutional review board or ethics committee that approved the study
- Include the approval number and/or a statement indicating approval of this research
- Indicate the form of consent obtained (written/oral) or the reason that consent was not obtained (e.g. the data were analyzed anonymously)

**Animal Research (involving vertebrate animals, embryos or tissues)**

- Provide the name of the Institutional Animal Care and Use Committee (IACUC) or other relevant ethics board that reviewed the study protocol, and indicate whether they approved this research or granted a formal waiver of ethical approval
- Include an approval number if one was obtained
- If the study involved *non-human primates*, add *additional details* about animal welfare and steps taken to ameliorate suffering
- If anesthesia, euthanasia, or any kind of animal sacrifice is part of the study, include briefly which substances and/or methods were applied

**Field Research**

Include the following details if this study involves the collection of plant, animal, or other materials from a natural setting:

- Field permit number
- Name of the institution or relevant body that granted permission

**Data Availability**

Authors are required to make all data underlying the findings described fully available, without restriction, and from the time of publication. PLOS allows rare exceptions to address legal and ethical concerns. See the [PLOS Data Policy](#) and [FAQ](#) for detailed information.

Yes - all data are fully available without restriction

A Data Availability Statement describing where the data can be found is required at submission. Your answers to this question constitute the Data Availability Statement and **will be published in the article**, if accepted.

**Important:** Stating 'data available on request from the author' is not sufficient. If your data are only available upon request, select 'No' for the first question and explain your exceptional situation in the text box.

Do the authors confirm that all data underlying the findings described in their manuscript are fully available without restriction?

**Describe where the data may be found in full sentences. If you are copying our sample text, replace any instances of XXX with the appropriate details.**

- If the data are **held or will be held in a public repository**, include URLs, accession numbers or DOIs. If this information will only be available after acceptance, indicate this by ticking the box below. For example: *All XXX files are available from the XXX database (accession number(s) XXX, XXX).*
- If the data are all contained **within the manuscript and/or Supporting Information files**, enter the following: *All relevant data are within the manuscript and its Supporting Information files.*
- If neither of these applies but you are able to provide **details of access elsewhere**, with or without limitations, please do so. For example:

*Data cannot be shared publicly because of [XXX]. Data are available from the XXX Institutional Data Access / Ethics Committee (contact via XXX) for researchers who meet the criteria for access to confidential data.*

*The data underlying the results presented in the study are available from (include the name of the third party*

All data files are available from the spss database

|                                                                                                                                                                                                                                         |                                                                                                                                     |
|-----------------------------------------------------------------------------------------------------------------------------------------------------------------------------------------------------------------------------------------|-------------------------------------------------------------------------------------------------------------------------------------|
| <p><i>and contact information or URL).</i></p> <ul style="list-style-type: none"><li>• This text is appropriate if the data are owned by a third party and authors do not have permission to share the data.</li></ul> <p>* typeset</p> |                                                                                                                                     |
| Additional data availability information:                                                                                                                                                                                               | Tick here if your circumstances are not covered by the questions above and you need the journal's help to make your data available. |

1 **Title**

2 **Prevalence of early childhood caries, risk factors and**  
3 **nutritional status among 3-5-year-old preschool children in**  
4 **Kisarawe, Tanzania.**

5

6 **Authors**

7 Tumaini S. Ndekero<sup>1</sup>, Lorna C. Carneiro<sup>1\*</sup>, Ray M. Masumo<sup>2</sup>

8 **Affiliations**

9 <sup>1</sup> Department of Restorative Dentistry, Muhimbili University of Health and Allied Sciences, Dar  
10 es salaam, Tanzania.

11 <sup>2</sup> Oral Health Section, Ministry of Health, Community Development, Gender, Elderly and  
12 Children, Dodoma, Tanzania.

13

14 **\*Corresponding author:**

15 Email: [carneiro2@hotmail.com](mailto:carneiro2@hotmail.com) (LCC)

16

17

18

19

20

21 **Abstract**

22 **Background:** Early childhood dental caries (ECC) is a serious public health problem.  
23 Correlation of prevalence of ECC with risk factors and anthropometric measures will shed  
24 evidence on the link between ECC and children's anthropometric and nutritional status. The data  
25 available from Tanzania rural population regarding ECC are scarce; therefore, this study aims to  
26 assess the prevalence of ECC, risk factors and nutritional status among 3-5-year-old preschool  
27 children in Kisarawe, Tanzania and to assess its correlation with the form, visible plaque scores  
28 in upper anterior teeth, total sugar exposure, anthropometric measures, and socio demographic  
29 attributes.

30 **Methods:** This cross-sectional study was conducted on 831 preschool children registered in  
31 public preschools in Kisarawe District. ECC was assessed using the WHO (2013) criteria, and  
32 anthropometric measures using the WHO Child Growth Standards (2006). Structured  
33 questionnaires were completed by children's parents through an interview. Collected information  
34 on socio-demographic attributes including oral hygiene and sugar exposure to their children was  
35 analyzed.

36 **Results:** Only 459 children (55.2%) were recognized as caries-free. The children's mean dmft  
37 index was 2.51. Children with visible plaque were the majority (56.1%). The dmft score index  
38 was negatively and significantly associated with weight-for-age z-score [Coefficient: -0.11 (95%  
39 CI: -0.76, -0.11)] and, positively significant associated with visible plaque score index  
40 [Coefficient: 0.16 (95% CI: 0.18, 0.52)] and total sugar exposure [Coefficient: 0.19 (95% CI:  
41 0.15, 0.38)] in the adjusted model. The prevalence of underweight was [4.2% (3.0- 5.8 95% CI)]



42 and severe underweight was [0.2% (0.1- 0.9 95% CI)] while prevalence of stunting was [1.6%  
43 (0.9- 2.7 95% CI)] and severe stunting was [0.4% (0.1- 1.1 95% CI)].

44 **Conclusion** This study demonstrated a significantly negative relationship between ECC and  
45 children anthropometric measures indicated by weight-for-age, and positive relationship with  
46 sugar exposure and poor oral hygiene indicated by visible plaque on upper anterior teeth.

47 **Key words:** Early Childhood Caries, nutritional status, risk factors, sugar exposure and oral  
48 hygiene, Tanzania.

49

## 50 **Introduction**

51 The World Health Organization (WHO) data suggest that the prevalence of dental caries has  
52 declined at the end of the previous and in the first decade of the present century [1]. Despite this  
53 considerable decline of a 90 % reduction in DMFT for 12-year-olds in Western Europe and the  
54 USA, caries still affects 60–90 % of the children throughout the world [1]. Although preventable,  
55 Early Childhood Caries (ECC) to 3-5 years old is a major dental public health concern not only  
56 in most European countries and the USA but also in disadvantaged communities in both  
57 developing and industrialized countries [1,2].

58 While some studies have evaluated and categorized the risk factors of ECC, to be related to  
59 sociodemographic factors, dietary factors and oral hygiene factors [3–5] other studies report  
60 familial socioeconomic background, lack of parental education, and lack of access to dental care  
61 [2] to be contributing factors for the high prevalence of ECC. However, the degree to which  
62 different risk factors are associated with ECC remains unclear.

63 ECC has been associated with other health problems, ranging from local pain, infections,  
64 abscesses, leading to difficulty in chewing, malnutrition and difficulty in sleeping [6].  
65 Furthermore, the associated pain from dental caries has a negative impact on children's  
66 emotional status, sleep patterns, and ability to learn or perform their usual activities. Preschool  
67 children with ECC, if left untreated, might experience dental pain leading to avoidance of certain  
68 types of foods which might interfere adversely with their nutritional status [7,8].

69 Preschool children need healthy teeth to chew and masticate foods, when they graduate from the  
70 weaning diet [9,10]. According to the UNICEF multifactorial model of 1990, sufficient dietary  
71 intake is among the immediate determinants of children's nutritional status.

72 Studies conducted among preschool children have documented the link between ECC with the  
73 detrimental impacts on the growth and development of a child although others have shown weak  
74 or no relationship between nutritional status and ECC [11]. Studies conducted by Clarke and  
75 colleagues in 2006 [12] and Wasunna in 2012 [13] reported differences in the percentiles of  
76 weights of under five years old preschool children with dental caries and without dental caries.  
77 Furthermore, studies by Filstrup and colleagues in 2003 [14] documented that pain, discomfort,  
78 and irritability attributed to caries have been associated with reduced food intake, disturbed  
79 sleeping habits, and impaired secretion of growth hormones. Shreds of evidence on the link  
80 between untreated ECC and children's nutritional status remain scanty, controversial, and non-  
81 conclusive [15,16].

82 In Africa the reported prevalence of ECC ranged between 47%, 58%, and 63% among 3, 4, and 5  
83 years old in South Africa [17] to 60% of girls and 52% of boys aged 3-5 years old in Khartoum-  
84 Sudan [18]. Similar findings were also documented in East African countries on the high  
85 prevalence of ECC among preschool children. Kiwanuka and colleagues in Uganda in 2004

86 found that the prevalence of ECC among children aged 3–5-years old was 56% in Kampala and  
87 64% in Nakawa [19]. Njoroge and colleagues in Kenya in 2010 reported the prevalence of ECC  
88 among preschool children aged 3-5 years old was 59.5% and, the highest component (95%) was  
89 the decayed component [20]. In Tanzania, Rwakatema and Ng'ang'a in 2010, reported prevalence  
90 of ECC among 3-5 years old preschool to 30.1% in Moshi Municipality with the highest  
91 component of 87% as the decayed [21]. Masumo and colleagues in their study of preschool  
92 children aged 4–6 years in Kisarawe documented that one third (30.2%) of participating  
93 preschool children had caries experience [11]. Furthermore, Mishu and colleagues in 2013  
94 documented that pain and dysfunction experienced by ECC affected the chewing of food leading  
95 to practice food selection [16]. Practice of food selection can affect the quantity and quality  
96 consumed resulting in under nutrition or over nutrition for those who select easy to eat fast foods  
97 [22]. The prevalence of stunting among preschool children as reported by the Tanzania National  
98 Nutrition Surveys (TNNS) decreased significantly from 34.7% in 2014 [23] to 31.8% in 2018  
99 [24]. The significant decrease in the prevalence of stunting was observed in seven regions of  
100 Tanzania Mainland including the Pwani region [24]. Further the TNNS of 2018 acknowledged  
101 that the newly recorded prevalence of underweight of 14.6% (13.9-15.3 95% CI) was  
102 significantly higher as compared to the recorded prevalence in TNNS 2014 (13.4%;  $p<0.05$ )  
103 [23,24]. 

104 There is a lack of information on the association between ECC, risk factors and nutritional status  
105 among children in Tanzania due to limited studies. The present study aimed to assess the  
106 prevalence of ECC in preschool children of 3–5-years in Kisarawe District and the associated  
107 risk factors and nutritional status by determining the visible plaque scores in upper anterior teeth,  
108 total sugar exposure, anthropometric measures, and socio demographic attributes. This study was

109 able to determine the relationship between ECC, risk factors and nutritional status of the  
110 preschool children in Kisarawe, Tanzania. 

111

## 112 **Materials and methods**

113 A cross-sectional study was conducted in Kisarawe district, one of the 6 districts in the Pwani  
114 Region of Tanzania. The district was conveniently chosen due to its rural (population of 84,174)  
115 and semi-urban (population of 17,424) characteristics [25]. The arrangement of the formal  
116 education in Tanzania institutes 2 years of pre-primary education, 7 years of primary education,  
117 4 years of ordinary secondary education, 2 years of advanced secondary education, and a  
118 minimum of 3 years of university education [26]. The official school-age of pre-primary  
119 education is 3 -6 years [26]. Kisarawe district is administratively divided into 15 wards which  
120 have a semi-urban and rural population: Cholesamvula, Kibuta, Kiluvya, Kisarawe, Kurui,  
121 Mafizi, Maneromango, Marui, Marumbo, Masaki, Msanga, Msimbu, Mzenga, Vihingo, and  
122 Vikumbulu. 

123 The district is home to about 108,398 people, out of whom 3.1% is 3 years old, 3.2 % is 4 years  
124 old and 3.0% is 5 years old [25] and, had eighty-three registered preschools at the time of the  
125 study [26]. Ethical approval for this study was granted by the Senate Research and Publication  
126 Committee of the Muhimbili University of Health and Allied Sciences in Tanzania (Ref. No.  
127 DA282/298/01.C). Further permission was granted by the District Executive Director and  
128 District Education Officer (President's Office, Regional Administrative and Local Government-  
129 Tanzania). With assistance of these offices one preschool from each ward was randomly  
130 selected. Respective Head-teachers were informed of the study and were requested to provide  
131 each child registered for preschool with a consent form for parents/guardians to sign and a letter

132 requesting them to escort their child to school on scheduled days. The total sample size of 831  
133 preschool children was estimated by assuming the proportion of weight and height, and ECC  
134 (outcome) among preschool children in Tanzania was 50%, with a margin error of 5%,  
135 confidence level of 95% and an assumed design effect of 2. Another 5% was added to the  
136 estimated sample size to account for non-response. Included in the study were children who were  
137 present with their parents or guardians and with signed consent to participate in the research.

## 138 **Interviews**

139 A structured questionnaire was translated in several steps; from English into Kiswahili by bi-  
140 lingual Kiswahili/English professionals, and then translated back to English by independent  
141 translators. Kiswahili is the national language spoken proficiently by almost 99% of the  
142 Tanzanian population and the reason for its use. Project professionals in the field reviewed the  
143 structured questionnaire for semantic, experiential, and conceptual equivalence to the original  
144 version. Sensitivity to culture and selection of appropriate words were considered.

145 Trained researchers (TS and LC) interviewed parent or guardian accompanying each child using  
146 the structured questionnaire. Information collected included sociodemographic factors, dietary  
147 habits, and oral health behavior of the children. Parent/guardian level of education and  
148 employment was also sought.

149 Demographic factors of preschool children were assessed in terms age, sex, and area of  
150 residency. Parents' reported children's behaviors on consumption of sugar snacks and drinks  
151 (biscuits or cake; candy or chocolate and; sweetened milk or soft drinks) being guided by the  
152 following questions: Does your child consume sugary food in between meals (0= No, 1= Yes);  
153 How many times a day does your child consume sugary food (0= less than 5 times a day, 1=  
154 more than 5 times a day); In the past 7 days did your child consume sugary foods (0= never, 1=

155 one day, 2= two to four days, 3= five days and more); What is the amount of sugar teaspoon  
156 usually consumed by your child in a day (0= No, 1= one to two teaspoon, 2= more than two  
157 teaspoon); Does your child ever report not being hungry during meal time cause of eating sugary  
158 food (0= No, 1= Yes); Do you often sweeten your child's milky food with sugar (0= No, 1=  
159 Yes); Do you often sweeten your child starchy food (e.g. porridge) with sugar (0= No, 1= Yes);  
160 Does your child consume frequent fruit juices or soda (0= No, 1= Yes) and; Does your child  
161 consume sweets (e.g. biscuits, cake, candy or chocolate) (0= No, 1= Yes). Total sugar  
162 consumption was calculated based on the overall intake of frequency. Scores of snacks and  
163 drinks were then summed to produce an overall score (range 2- 23). The overall score was used  
164 to indicate the daily frequency of intake of sugars for each participant. In addition parents'  
165 reported children's daily behavior of consuming fresh fruits and vegetables: Does your child  
166 consume fruits (0= no, 1= once a day, 2= twice a day, 3= thrice a day, 4= more than 3 times a  
167 day) and; Does your child consume vegetables (0= no, 1= once a day, 2= twice a day, 3= more  
168 than 2 times a day). Dummy variables were summarized (range 0- 7) and used as a continuous  
169 variable. Other oral health behaviors were assessed by asking parents to report on: Do you assist  
170 your child to brush (0= No, 1= Yes); Do you use fluoride toothpaste while brushing your child  
171 (0= No, 1= Yes) and; how frequent does your child brush (0= no, 1= once a day, 2= twice a day,  
172 3= thrice a day, 4= more than 3 times a day) and then summarized into (0= No, 1= Yes).  
173 Parent/guardian was requested to provide information on level of education (0=primary and  
174 lower level of education, 1=secondary and higher level of education) and employment (0= not  
175 employed, 1= employed) of both parents/guardians of the child. 

176 **Clinical examination**

177 Calibration exercises for the examiners with respect to presence/absence of visible plaque [27]  
178 and early childhood caries were carried out according to the guidelines published by the British  
179 Association of the Study of Community Dentistry (BASCD) [28].  
180 Children were clinically examined using a dental mirror and natural light by calibrated dentists  
181 (TN and LC) while in a knee-to-knee position. Upper anterior teeth; incisors, lateral incisors and  
182 canines were examined visually for presence of plaque which was recorded on the basis of  
183 absence of visible plaque = 0 or presence of visible plaque = 1. Dummy variables (0 = No, 1 =  
184 Yes) were summarized (range 0 – 6) and dichotomized into children with a count of a plaque  
185 score of 0 as having “good oral hygiene” while children with plaque score of one or more were  
186 regarded as having “poor oral hygiene”.  
187 Following plaque assessment, visual inspection of children’s deciduous teeth for ECC was done  
188 after wiping and drying using a piece of sterile gauze. With the aid of a disposable dental mirror,  
189 absence/presence of a carious lesion was recorded in the recommended WHO Oral Health  
190 Assessment Form for Children, 2013 [29]. A score of 0 denoted absence of any visible carious  
191 lesion while a score of 1 denoted presence of visible carious lesion. Missing and filled teeth were  
192 given a score of 1. In the present analysis, dmft was used as a count variable following  
193 dichotomizing into caries free (dmft = 0) or with caries experience (dmft =1).

194 **Nutritional status**

195 Nutritional status among preschool children was assessed by anthropometric measures based on  
196 the WHO Growth Standards 2006 [30]. A trained registered nurse from the Muhimbili National  
197 Hospital measured and recorded the weight and height of each child. Preschool children were  
198 asked to remove their shoes before measurement of weight and height were taken using the Seca

199 weight and height measuring machine (Model 786, Mechanical column scale with large round  
200 dial and stadiometer, CE 0123, Vogel and Halke, Germany). Based on the WHO Growth  
201 Standards 2006, weight, height and age measures were converted to z-scores, namely weight-for-  
202 age, weight-for-height, and height-for-age [30]. The Z-score was used because of its recognition  
203 as the best system for analysis and presentation of anthropometric data for preschool children  
204 and because of its advantages compared to the other methods [31].

205

### 206 **Reliability of ECC and anthropometric measures**

207 Prior to the fieldwork, two trained dentists (TN and LC) were calibrated for scoring of ECC  
208 lesions in preschool children. Calibration was performed using images of different clinical  
209 situations on two separate occasions with a one-week interval between sessions. The minimum  
210 intra-examiner agreement was 0.83 and the minimum inter-examiner agreement was 0.78.  
211 During the fieldwork, duplicate examinations one week apart were performed with 74 preschool  
212 children randomly chosen. Intra examiner reliability in terms of Cohen's kappa ranged from 0.81  
213 to 0.89, respectively. 

214 The person who did anthropometric measurements was calibrated prior to the study with an  
215 agreement was 0.85. Being blinded to the oral health status, weight and height of participants  
216 were measured with a weight and height scale to the nearest 0.5 kilograms and 0.5 cm  
217 respectively. The equipment was recalibrated daily prior to the procedure. The level of intra-  
218 examiner agreement (Cohen's kappa) of 0.72, was considered substantial.

219



## 220 **Statistical analysis**

221 The collected data were entered into the Epi Info version 3.5.4 and ENA Software and further  
222 analysis in Predictive Analytics Software, IBM SPSS Statistics version 20. To determine the  
223 mean of the children's dmft index and the prevalence of the children with ECC, Pearson Chi-  
224 square and One-way ANOVA was used to estimate the relationship between demographic  
225 factors (age, sex, and residency) and oral health behaviors (assist the child to brush, child use  
226 toothpaste while brushing and, frequency of child tooth brushing). Further, the description of  
227 anthropometric measurement (actual weight and height, and z-score for weight-for-age, height-  
228 for-age and weight-for-height), visible plaque score index, sugar consumption index, fresh fruit  
229 consumption index, and ECC (dmft index) among preschool children was determined.

230 To control the effect of possible confounding factors, all variables were entered into multiple  
231 logistic regression and Poisson regression models with the dmft >1 and, dmft index as dependent  
232 variables. Moreover, a simple linear regression model with the children's dmft index as the  
233 dependent variable was constructed to explore the relationship with weight (in Kg), height (in  
234 cm), age (in months), weight-for-age z-score (WAZ), height-for-age z-score (HAZ), weight-for-  
235 height z-score (WHZ), Visible plaque score index, sugar consumption and, fresh fruit  
236 consumption. An alpha level of 0.05 was considered as statistical significance. The multilevel  
237 linear analysis was further constructed to explore the association between dmft index (dependent  
238 variable) and, weight-for-age z-score, height-for-age z-score, weight-for-height z-score  
239 (independent variables), adjusted with all variables associated with either dmft >1 or dmft index  
240 (visible plaque score index, sugar consumption, residence, mothers working status, assist child to  
241 brush and, child use toothpaste during brush). The same sets of models were used to assess the  
242 bidirectional association between dmft index (independent variable) and weight-for-age z-score,  
243 height-for-age z-score, weight-for-height z-score (dependent variables).

244

## 245 **Results**

246 Most parents of preschool children (N=860) invited to the study consented to participate  
247 (response rate= 97%). Although 80.4% (n=668) and 86.3% (n= 717) of preschool fathers and  
248 mothers had primary education, more than nine percent of fathers and mothers (n= 746 and n=  
249 795) were not employed respectively. The mean age of the participants was 50.34 ( $\pm$ 8.41)  
250 months with almost equal male/female ratio [male= 48.3% (n= 401) and female= 51.7 (n= 430)].  
251 Mother parents 67.9% (n=564) reported not to assist their children tooth brushing and 81.0% (n=  
252 673) reported their children to use toothpaste while brushing. However only 23.1% (n= 192)  
253 reported their children to brush more than once in a day.

254

## 255 **Children's oral health status**

256 According to the clinical oral examination, prevalence of ECC was 44.8%. Children with one to  
257 four, and more than five decayed teeth were 47.7% (n= 219), and 21.8% (n= 101), respectively.  
258 The dmft of 2.51 was contributed to mainly by the decayed component. More than half [56.1%  
259 (n= 466)] of the participating preschool children had visible plaque on buccal surfaces of upper  
260 anterior teeth. Of the 56.1% children with visible plaque, 11.8% (n= 55), 37.8% (n= 176), and  
261 50.4% (n= 235) had one, two, and more than two teeth with visible plaque, respectively.

## 262 **Results of anthropometric measures**

263 Figure 1 shows the distribution of Weight-for-Age of preschool children aged 3 to 5 years in  
264 Kisarawe is shifted to the left but still following the WHO standard natural distribution of  
265 reference population when WHO flags are applied with mean z-score  $-0.39 \pm 1.06$  SD.

266 **Figure 1** Weight-for-Age z-score (WHO 2006)

267 As shown in Table 1, the prevalence of underweight (<-2 z-score) was [4.2% (3.0- 5.8 95% CI)]

268 and, severe underweight (<-3 z-score) was [0.2% (0.1- 0.9 95% CI)].

269

270 **Table 1- Simple linear regression analysis dmft index with anthropometric measures,**  
 271 **visible plaque score index, sugar consumption index and fresh fruit consumption index**

| No | Variable                                                                                                                                                                                                                                                                                                                                                                                                                         | Mean ± SD     | Coefficient (95% CI)  |
|----|----------------------------------------------------------------------------------------------------------------------------------------------------------------------------------------------------------------------------------------------------------------------------------------------------------------------------------------------------------------------------------------------------------------------------------|---------------|-----------------------|
| 1  | Weight (in Kg)                                                                                                                                                                                                                                                                                                                                                                                                                   | 15.82 ± 2.10  | -0.03 (-0.15, 0.07)   |
| 2  | Height (in cm)                                                                                                                                                                                                                                                                                                                                                                                                                   | 106.6 ± 6.67  | -0.02 (-0.05, 0.03)   |
| 3  | Age (in months)                                                                                                                                                                                                                                                                                                                                                                                                                  | 50.34 ± 8.407 | -0.03 (-0.04, 0.02)   |
| 4  | Weight-for-age z-score (WAZ) <ul style="list-style-type: none"> <li>• Prevalence of underweight (&lt;-2 z-score) = 4.2% (3.0- 5.8 95% CI)</li> <li>• Prevalence of moderate underweight (&lt;-2 z-score and &gt;=-3 z-score) = 4.0% (2.8- 5.5 95% CI)</li> <li>• Prevalence of severe underweight (&lt;-3 z-score) = 0.2% (0.1- 0.9 95% CI)</li> </ul>                                                                           | -0.39 ± 1.06  | -0.07 (-0.61, 0.003)* |
| 5  | Height-for-age z-score (HAZ) <ul style="list-style-type: none"> <li>• Prevalence of stunting (&lt;-2 z-score) = 1.6% (0.9- 2.7 95% CI)</li> <li>• Prevalence of moderate stunting (&lt;-2 z-score and &gt;=-3 z-score) = 1.2% (0.7- 2.2 95% CI)</li> <li>• Prevalence of severe stunting (&lt;-3 z-score) = 0.4% (0.1- 1.1 95% CI)</li> </ul>                                                                                    | 0.57 ± 1.08   | -0.03 (-0.45, 0.19)   |
| 6  | Weight-for-height z-score (WHZ) <ul style="list-style-type: none"> <li>• Prevalence of global acute malnutrition (&lt;-2 z-score and/or oedema) = 29.8% (26.8-33.0 95% CI)</li> <li>• Prevalence of moderate acute malnutrition (&lt;-2 z-score and &gt;=-3 z-score, no oedema) = 24.7% (21.9-27.8 95% CI)</li> <li>• Prevalence of severe acute malnutrition (&lt;-3 z-score and/or oedema) = 5.1% (3.8- 6.8 95% CI)</li> </ul> | -1.18±1.45    | -0.03 (-0.35, 0.15)   |
| 7  | Visible plaque score index                                                                                                                                                                                                                                                                                                                                                                                                       | 1.40 ± 1.38   | 0.18 (0.22, 0.56)***  |
| 8  | Sugar consumption                                                                                                                                                                                                                                                                                                                                                                                                                | 15.45 ± 2.12  | 0.17 (0.13, 0.36)***  |
| 9  | Fresh fruit consumption                                                                                                                                                                                                                                                                                                                                                                                                          | 2.83 ± 1.08   | 0.02 (-0.19, 0.27)    |
|    | *** p<0.01<br>*p<0.05                                                                                                                                                                                                                                                                                                                                                                                                            |               |                       |

272

273 The Figure 2 shows that the distribution of Height-for-Age of the assessed preschool children in  
274 Kisarawe was shifted to the right and was flatter as compared to the WHO standard normal  
275 distribution of reference population even when WHO flags are applied. The mean HAZ was 0.57  
276  $\pm$  1.08. The distribution was flattened may contributed by difficulties encountered during data  
277 collection for age estimation.

#### 278 **Figure 2: Height-for-Age z-score (WHO 2006)**

279 As shown in Table 1, the prevalence of stunting ( $<-2$  z-score) was [1.6% (0.9- 2.7 95% CI)] and,  
280 severe stunting ( $<-3$  z-score) was [0.4% (0.1- 1.1 95% CI)]. Figure 3 shows that the distribution  
281 of Weight-for-Height is shifted to the left but still following the WHO standard normal  
282 distribution of reference population, with mean WHZ  $-1.18 \pm 1.45$  SD. The standard deviation  
283 indicates difficulties encountered during data collection for age estimation during data collection.

#### 284 **Figure 3: Weight-for-Height z-score (WHO 2006)**

285 As shown in Table 1, the prevalence of global acute malnutrition ( $<-2$  z-score and/or oedema)  
286 was [29.8% (26.8-33.0 95% CI)] and, severe acute malnutrition ( $<-3$  z-score and/or oedema) was  
287 [5.1% (3.8- 6.8 95% CI)].

### 288 **Univariate analysis of risk factors associated with dmft $\geq 1$ and dmft** 289 **score index**

290 In univariate analysis as presented in Table 2, chi-square test showed that children whose  
291 residency are semi-rural and having visible plaque on upper anterior teeth were significant  
292 associated with the prevalence of ECC (dmft  $\geq 1$ ) both  $p < 0.001$ .

293 Further, the one-way between groups analysis of variance (ANOVA) conducted to explore the  
294 impact of various risk factors on the mean score of dmft index showed a statistically significant  
295 difference at the  $p < 0.001$  level in dmft index scores at two residency groups  $F(1, 616) = 6.37$ ,  $p$

296 < 0.001. Despite reaching statistical significance, the actual difference in mean scores between  
 297 groups was quite small. The effect size, calculated using eta squared, was 0.01.

298

299 **Table 2 – Univariate and multivariate analysis of different factors associated with dental**  
 300 **caries status in deciduous tooth (n=831)** 

|                                                                                                                                               |                                | Univariate analysis                   |                            | Multivariate analysis    |                          |
|-----------------------------------------------------------------------------------------------------------------------------------------------|--------------------------------|---------------------------------------|----------------------------|--------------------------|--------------------------|
|                                                                                                                                               |                                | dmft $\geq$ 1                         | dmft index                 | dmft $\geq$ 1            | dmft index               |
| Variables                                                                                                                                     | Categories                     | <sup>1a</sup> Caries prevalence % (n) | <sup>1b</sup> F- test (df) | <sup>1c</sup> OR, 95% CI | <sup>1d</sup> RR, 95% CI |
| Child sex                                                                                                                                     | Male                           | 50.3 (187)                            | 0.85 (1)                   | 1                        | 1.08 (0.98, 1.19)        |
|                                                                                                                                               | Female                         | 49.7 (185)                            |                            | 1.11 (0.85, 1.46)        | 1                        |
| Child age                                                                                                                                     | 3 years                        | 3.2 (12)                              | 0.41 (2)                   | 1                        | 1.12 (0.88, 1.42)        |
|                                                                                                                                               | 4 years                        | 18.8 (70)                             |                            | 1.48 (0.65, 3.37)        | 0.92 (0.81, 1.05)        |
|                                                                                                                                               | 5 years                        | 78.0 (290)                            |                            | 1.02 (0.47, 2.18)        | 1                        |
| Residence                                                                                                                                     | Rural                          | 84.7 (315)                            | 6.37 (1)***                | 1                        | 1.34 (1.15, 1.56) ***    |
|                                                                                                                                               | Semi-rural                     | 15.3 (57)***                          |                            | 0.55 (0.39, 0.79)***     | 1                        |
| Mothers level of education                                                                                                                    | Informal and Primary education | 86.6 (322)                            | 2.48 (1)                   | 1                        | 1.034 (0.8, 1.25)        |
|                                                                                                                                               | Secondary education and above  | 13.4 (50)                             |                            | 0.96 (0.64, 1.43)        | 1                        |
| Fathers level of education                                                                                                                    | Informal and Primary education | 79.8 (295)                            | 1.81 (1)                   | 1                        | 1.11 (0.95, 1.29)        |
|                                                                                                                                               | Secondary education and above  | 20.2 (75)                             |                            | 0.72 (1.07, 1.58)        | 1                        |
| Mothers working condition                                                                                                                     | Unemployed                     | 96.2 (358)                            | 4.03 (1)*                  | 1                        | 1.65 (1.19, 2.27)***     |
|                                                                                                                                               | Employed                       | 3.8 (14)                              |                            | 0.78 (0.39, 1.53)        | 1                        |
| Fathers working condition                                                                                                                     | Unemployed                     | 90.1 (335)                            | 0.92 (1)                   | 1                        | 0.95 (0.78, 1.15)        |
|                                                                                                                                               | Employed                       | 9.9 (37)                              |                            | 0.95 (0.60, 1.49)        | 1                        |
| Do you assist your child to brush?                                                                                                            | No                             | 64.5 (240)                            | 0.50 (1)                   | 1                        | 0.85 (0.77, 0.95)***     |
|                                                                                                                                               | Yes                            | 35.5 (132)                            |                            | 1.32 (0.98, 1.77)        | 1                        |
| Does your child use toothpaste while brushing?                                                                                                | No                             | 18.3 (68)                             | 3.23 (1)                   | 1                        | 1.18 (1.04, 1.34)***     |
|                                                                                                                                               | Yes                            | 81.7 (304)                            |                            | 1.09 (0.77, 1.55)        | 1                        |
| Frequent child tooth brushing                                                                                                                 | Not every day                  | 3.0 (11)                              | 0.10 (2)                   | 1                        | 1.10 (0.79, 1.54)        |
|                                                                                                                                               | Once a day                     | 73.9 (275)                            |                            | 1.04 (0.45, 2.45)        | 1.11 (0.98, 1.25)        |
|                                                                                                                                               | Twice or more a day            | 23.1 (86)                             |                            | 1.01 (0.73, 1.39)        | 1                        |
| Visible plaques dichotomous score                                                                                                             | No                             | 29.6 (110)***                         | 16.08 (1)                  | 1                        | 0.69 (0.58, 0.73)***     |
|                                                                                                                                               | Yes                            | 70.4 (262)                            |                            | 2.97 (2.23, 3.96)***     | 1                        |
| <sup>1a</sup> Pearson Chi-square test<br><sup>1b</sup> One Way Anova<br><sup>1c</sup> Logistic regression<br><sup>1d</sup> Poisson regression |                                |                                       |                            |                          |                          |
| *** p<0.01<br>*p<0.05                                                                                                                         |                                |                                       |                            |                          |                          |

301

302 As shown Table  a simple linear regression was carried out to test if weight (in Kg), height (in  
303 cm), Age (in months), weight-for-age z-score, height-for-age z-score, weight-for-height z-score,  
304 visible plaque score index, sugar consumption scores and, fresh fruit consumption scores  
305 significantly predicted dmft score index. The results of the regression indicated that the dmft  
306 score index was negatively and significantly associated with weight-for-age z-score (Coefficient:  
307 -0.07; 95% CI: -0.61, 0.00) in the unadjusted model. Moreover, there were significant increases  
308 in visible plaque scores index and sugar consumption scores with regression coefficient of 0.18  
309 (95% CI: 0.22, 0.56) and 0.17 (95% CI: 0.13, 0.36), respectively.

### 310 **Multivariate Logistic regression, Poisson regression and Linear** 311 **regression analysis of risk factors associated with dmft $\geq 1$ and dmft** 312 **score index**

313 As shown in Table 2, lower prevalence of ECC (i.e. dmft  $\geq 1$ ) had been associated with children  
314 whose residency where from semi-rural [adjusted OR 0.55 (95% CI: 0.39, 0.79)] and, higher  
315 prevalence from children with presence of visible dental plaque [adjusted OR 2.97 (95% CI:  
316 2.23, 3.96)]. Poisson regression were employed to rule out the risk of losing precision when dmft  
317  $\geq 1$  employed in the multiple variable logistic regression analysis. The dmft scores index shows  
318 significant association with residence [adjusted RR 1.34 (95% CI: 1.15, 1.56)], mothers working  
319 condition [adjusted RR 1.65 (95% CI: 1.19, 2.27)], do you assist your child to brush? [Adjusted  
320 RR 0.85 (95% CI: 0.77, 0.95)], does your child use toothpaste while brushing? [Adjusted RR  
321 1.18 (95% CI: 1.04, 1.34)] and, presence of visible plaques [adjusted 0.69 (95% CI: 0.58, 0.73)].

322 As shown in Table 3, a multilevel linear analysis to explore the association between change dmft  
323 score index and weight-for-age z-score adjusted with visible plaque score index, sugar  
324 consumption, residence, mothers working status, assist child to brush and, child use toothpaste  
325 during brush revealed that: The dmft score index was negatively and significantly associated

326 with weight-for-age z-score [Coefficient: -0.11 (95% CI: -0.76, -0.11)] and, positively significant  
 327 associated with visible plaque score index [Coefficient: 0.16 (95% CI: 0.18, 0.52)] and sugar  
 328 consumption score [Coefficient: 0.19 (95% CI: 0.15, 0.38)] in the adjusted model. However,  
 329 dmft score index was not statistically significant with height-for age z-score and weight for  
 330 height z-score.

331

332 **Table 3. Multilevel linear analysis of factors associated with dmft score**  
 333 **index** 

| Variable                                    | Dmft score index         |                       |                      |
|---------------------------------------------|--------------------------|-----------------------|----------------------|
|                                             | Coefficient (95% CI)     | Coefficient (95% CI)  | Coefficient (95% CI) |
| Weight for age z-score                      | -0.11 (-0.76, -0.11) *** |                       |                      |
| Height for age z-score                      |                          | -0.07 (-0.59, 0.05)   |                      |
| Weight for height z-score                   |                          |                       | -0.05(-0.41, 0.08)   |
| Visible plaque index                        | 0.16 (0.18, 0.52) ***    | 0.16 (0.17, 0.52) *** | 0.16 (0.18, 0.52)*** |
| Sugar consumption                           | 0.19 (0.15, 0.38) ***    | 0.18 (0.15, 0.37) *** | 0.18 (0.14, 0.37)*** |
| Residence                                   | -0.06 (-1.10, 0.15)      | -0.07 (-1.14, 0.16)   | -0.07 (-1.16, 0.09)  |
| Mothers working status                      | -0.07 (-2.01, 0.09)      | -0.07 (-2.01, 0.11)   | -0.07 (-2.03, 0.09)  |
| Do you assist your child to brush           | -0.06 (-0.10, 0.92)      | 0.07 (-0.09, 0.94)    | 0.07 (-0.08, 0.95)   |
| Does your child use toothpaste during brush | -0.08 (-1.26, 0.01)*     | -0.08 (-1.24, 0.04)   | -0.07 (-1.19, 0.09)  |
| *** p<0.01                                  |                          |                       |                      |
| *p<0.05                                     |                          |                       |                      |

334

335

336 In Table 4 we further explored the bilateral relation of weight-for-age z-score, height-for age z-  
 337 score and, weight for height z-score (as dependent variables) and dmft score index (as dependent  
 338 variable) adjusted with visible plaque score index, sugar consumption, residence, mothers  
 339 working status, assist child to brush and, child use toothpaste during brushing revealed that:  
 340 weight-for-age z-score were still negatively and significantly associated with dmft score index

341 [Coefficient: -0.11(95% CI: -0.05, -0.01)]. However, height-for age z-score and, weight for  
 342 height z-score were not statistically significant with dmft score index.

343

344 **Table 4. Multilevel linear analysis of factors associated with changes in Weight for age z-score,**  
 345 **Height for age z-score and Weight for height z-score** 

|                                             | <b>Weight for age z-score</b> | <b>Height for age z-score</b> | <b>Weight for height z-score</b> |
|---------------------------------------------|-------------------------------|-------------------------------|----------------------------------|
| <b>Variable</b>                             | <b>Coefficient (95% CI)</b>   | <b>Coefficient (95% CI)</b>   | <b>Coefficient (95% CI)</b>      |
| dmft index                                  | -0.11(-0.05, -0.01)***        | -0.07 (-0.04, 0.003)          | -0.06 (-0.04, 0.01)              |
| Visible plaque index                        | 0.06 (-0.01, 0.07)            | 0.04 (-0.02, 0.06)            | 0.05 (-0.02, 0.09)               |
| Sugar consumption                           | 0.09 (0.01, 0.06)*            | 0.09 (0.003, 0.06)*           | 0.05 (-0.02, 0.06)               |
| Residence                                   | 0.08 (0.01, 0.32)*            | 0.07 (-0.02, 0.30)            | 0.05 (-0.07, 0.34)               |
| Mothers working status                      | 0.01 (-0.23, 0.29)            | 0.03 (-0.16, 0.37)            | 0.02 (-0.25, 0.44)               |
| Do you assist your child to brush           | -0.07 (-0.24, 0.02)           | -0.09 (-0.27, -0.02)*         | -0.07 (-0.31, 0.02)              |
| Does your child use toothpaste during brush | -0.08 (-0.30, 0.02)           | -0.06 (-0.28, 0.04)           | 0.04 (-0.11, 0.31)               |
| *** p<0.01                                  |                               |                               |                                  |
| *p<0.05                                     |                               |                               |                                  |

346

347 

## 348 Discussion

349 This population based cross-sectional study aims to described the effect  of ECC on nutritional  
 350 status of preschool children in the Kisarawe District of Pwani Region, Tanzania. There is a  
 351 growing body of evidence that suggests significant decline of dental caries among 12-year-olds  
 352 in most developed countries [32], however, ECC is still affecting 60–90 % of preschool children  
 353 throughout the world [1]. The most important from a general health and well-being point of view  
 354 is that among preschool children, over 90% of ECC remains untreated accompanied with



355 discomfort or toothache affecting young children's growth and well-being [10]. There is dearth  
356 of information documented on how untreated carious lesions does affect the growth and  
357 wellbeing of millions of young children in Sub- Saharan African countries including Tanzania.  
358 This lack of information has been observed despite the Regional strategy on Oral health 2016-  
359 2025 that emphasized on shifting the focus of dental research from the causes of the dental  
360 diseases to how dental diseases affect general health [33].

361 In this study, we revealed that the prevalence of ECC was 44.8% among preschool children aged  
362 3-5 years old in Kisarawe District in Tanzania which is considerable higher as compared to the  
363 prevalence of 30.1% that was documented in the study of Rwakatema and Ng'ang'a among 3-5  
364 years old in Moshi Municipality, Tanzania [21], and slightly similar to prevalence of 48.6%  
365 documented among 3–5 years old from a rural community of Uganda [34]. However, the  
366 prevalence of ECC reported in this study is still higher as compared to the prevalence  
367 documented by Nobile and colleagues in Southern Italy [35]. Furthermore, the mean dmft index  
368 score in the children of this study was slightly similar to that documented by Musinguzi and  
369 colleagues among preschool children in the rural community [34], and considerably higher than  
370 that of developed countries [36]. The documented low prevalence of ECC in developed countries  
371 is much contributed by the implementation of effective prevention programs, which should be  
372 considered in developing countries. Increased use of fluoride toothpaste was the most probable  
373 reasons for decrease in ECC in most developed countries [1]. Evidences have also shown that  
374 application of 5% sodium fluoride varnish can remineralize early enamel caries in children [37]  
375 and, using silver diamine fluoride solution at 38% can arrest active dentine caries when applied  
376 biannually [37].

377 Sufficient oral hygiene is one of the prerequisites for preventing ECC to preschool children.  
378 However, the majority of the preschool children in the present study unveiled poor oral hygiene,  
379 characterized by the presence of clinically visible plaque on upper anterior teeth. Different  
380 studies have further documented on association between ECC and supervision during brushing,  
381 and have established that preschool children have not attained the manual dexterity that is needed  
382 for the maintenance of oral hygiene. In this study we found that only 32.1% of parents reported  
383 supervising their preschool children during brushing. The dental caries experienced by  
384 participants may be explained by the lack of accompaniment by parents during tooth brushing or  
385 unawareness of parents concerning oral hygiene practices. Similarly findings were documented  
386 by other studies conducted in sub Saharan African countries [38].

387 Preschool children who resided in rural areas experienced greater impact of ECC in comparison  
388 to those residing in semi-rural areas of Kisarawe district. Similarly findings were documented by  
389 other studies [11,39]. However studies emanating from the sub Saharan countries could not  
390 establish such an association [40,41]. Inadequate oral health care information and, inefficient  
391 oral hygiene practices seem to explain the high levels of ECC among preschool children residing  
392 in rural areas.

393 A low parent schooling level (informal and primary school levels) may indicate inadequate  
394 knowledge regarding oral health care, and subsequently a greater number of ECC in preschool  
395 children. The present study analyzed both fathers and mother's schooling level in association  
396 with preschool children ECC. The assessment of both parents is necessary as all of them are  
397 main caregivers and educators of their children and, this study could not establish association  
398 between parent's levels of education and ECC to preschool children. In contrast, another study  
399 reported an association between preschool ECC and a lower level of parents schooling [42].

400 However, the comparison between the two studies is limited by methodological differences, such  
401 as the study design and the method for evaluating preschool ECC. Moreover, the household  
402 economic status is associated with the level of the parents' schooling, access to information  
403 regarding health, and access to healthcare services.

404 In terms of socio-demographic factors, the prevalence of preschool children ECC was associated  
405 with age and oral hygiene as was previous reported in recent study conducted in Kisarawe [11].  
406 The trend found concerning a greater prevalence of preschool children ECC was associated with  
407 an increase in age, and with caries being more common among the five-year-old's, in agreement  
408 with findings reported in other studies [34,43]. This result can be explained by the change in the  
409 dietary habits and hygiene practices in older children [34].

410 This study provided initial evidence regarding the association between preschool children dental  
411 caries and underweight (WAZ<-2SD) where the dmft score index was negatively and  
412 significantly associated with weight-for-age z-score [Coefficient: -0.11 (95% CI: -0.76, -0.11)].  
413 There are several studies documenting on the association between WAZ and change in ECC  
414 among preschool children [38,44]. While a lack of association was occasionally reported [45],  
415 several studies, mostly in developed countries, demonstrated a negatively and significant  
416 relationship [46,47]. On the other hand, other studies argued that WAZ among preschool  
417 children would result in increase in ECC increment [38], which was in accordance with the  
418 results of this study.

419 The global information on the association between WHZ and preschool ECC is inconclusive and  
420 controversial. Some studies have shown significant associations while others show weak or no  
421 relationship between nutritional status and preschool ECC [45]. In the present study, the  
422 association between WHZ and preschool ECC were not established. On the contrary a study

423 conducted in Sub Saharan Africa reported an association between WHZ and dmft score index,  
424 and closely linked it with poverty as a main contributory factor [38]. However, in this study the  
425 assessment of participant's poverty or socio-economic status was not considered. Further in this  
426 study there was no significant association between stunting HAZ and preschool ECC. This can  
427 be attributed to the low prevalence of stunting [1.6% (95% CI; 0.9- 2.7 95% CI)] in comparison  
428 to the recent reported stunting in the country was [31.8% (95% CI; 30.7-32.9)] [24] a possibility  
429 that the children were not subjected to chronic or prolonged food deficiencies.

430 The relationship between WAZ/HAZ and preschool ECC could also be confounded by other  
431 factors. It is worth noting that the bidirectional associations between preschool caries on one  
432 hand, and WAZ and HAZ on the other were independent from a number of risk factors related to  
433 the development of dental caries such as sugar consumption, oral hygiene and family residence.  
434 Unsurprisingly, sugar consumption was associated with change in preschool dental caries, which  
435 is consistent with the literatures on the role of sugars in the development of caries [32,48]. This  
436 study provides some implications for future studies. Controlling risk factors such as sugary diet  
437 appears to promote general health and decrease the prevalence of many chronic diseases in a  
438 more efficient and effective way [49,50].

439 Several limitations could be found in the present study. Firstly, the major limitation of this study  
440 relates to the study design and the fact that these results cannot be generalized to the entire  
441 population, because the sample calculation was drawn from preschool children enrolled in public  
442 schools however it provides baseline data for further studies. Secondly, some potential factors  
443 that contributed to ECC, such as poverty and/or socio-economic status were not included in this  
444 study. We did not survey the socio-economic status because many parents were not in formal  
445 sectors and expressed uncertainty even on the values of fixed assets they possess when we

446 conducted the pilot investigation. Thirdly, there may have been an unavoidable recall bias from  
447 the children's parents in responding to questions. Finally, the present study was a cross-sectional  
448 investigation, so causal inference was limited.

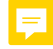

## 450 **Conclusions**

451 This study demonstrated a significant negative relationship between ECC and children  
452 anthropometric measures indicated by weight-for-age, and positive relationship with sugar  
453 exposure and poor oral hygiene indicated by visible plaque on upper anterior teeth. Furthermore,  
454 these findings highlight the significance of ECC as a potential contributing risk factor for  
455 children growth indexes.

## 457 **Acknowledgements**

458 We acknowledge the Muhimbili University of Health and Allied Sciences, the administrative  
459 authorities in Kisarawe District, preschool children for their participation, teachers, parents and  
460 all of those with whom we had the pleasure to work during this project.

## 462 **References**

- 463 1. Lagerweij MD, van Loveren C. Declining Caries Trends: Are We Satisfied? *Curr Oral*  
464 *Heal Reports*. 2015;2(4):212–217.
- 465 2. Anil S, Anand PS. Early childhood caries: Prevalence, risk factors, and prevention. *Front*  
466 *Pediatr*. 2017;5(157):1–5.
- 467 3. Warren JJ, Blanchette D, Dawson D V., Marshall TA, Phipps KR, Starr D, et al. Factors

- 468 associated with dental caries in a group of American Indian children at age 36 months.  
469 Community Dent Oral Epidemiol. 2016;44(2):154-61.
- 470 4. Östberg AL, Skeie MS, Skaare AB EI. Caries increment in young children in Skaraborg,  
471 Sweden: associations with parental sociodemography, health habits, and attitudes. Int J  
472 Paediatr Dent [Internet]. 2017;27(2):47–55. Available from: doi: 10.1111/ipd.12225. Epub  
473 2016 Jan 30. PMID: 26826705.
- 474 5. Weston-Price S, Copley V, Smith H, Davies GM. A multi-variable analysis of four factors  
475 affecting caries levels among five-year-old children; deprivation, ethnicity, exposure to  
476 fluoridated water and geographic region. Community Dent Health. 2018;35(4):217–22.
- 477 6. Finlayson TL, Siefert K, Ismail AI, Sohn W. Psychosocial factors and early childhood  
478 caries among low-income African-American children in Detroit. Vol. 35, Community  
479 Dentistry and Oral Epidemiology. 2007.
- 480 7. UNICEF. The United Nations Children’s Fund Conceptual Framework for the  
481 Determinants of Nutritional status. 1990.
- 482 8. Masumo R, Bardsen A, Mashoto K, Åstrøm AN. Child- and family impacts of infants’  
483 oral conditions in Tanzania and Uganda- a cross sectional study. BMC Res Notes.  
484 2012;5(538):1–10.
- 485 9. Alvarez JO. Nutrition, tooth development, and dental caries. Am J Clin Nutr.  
486 1995;61(2):410S-416S.
- 487 10. Çolak H, Dülgergil Ç, Dalli M, Hamidi M. Early childhood caries update: A review of  
488 causes, diagnoses, and treatments. J Nat Sci Biol Med. 2013;4(4):29–38.

- 489 11. Masumo RM, Ndekero TS, Carneiro LC. Prevalence of dental caries in deciduous teeth  
490 and oral health related quality of life among preschool children aged 4-6 years in  
491 Kisarawe, Tanzania. *BMC Oral Health*. 2020;20(1):1–10.
- 492 12. Clarke M, Locker D, Berall G, Pencharz P, Kenny DJ, Judd P. Malnourishment in a  
493 population of young children with severe early childhood caries. *Pediatr Dent*.  
494 2006;28(3):254–9.
- 495 13. Wasunna D. Nutritional Status of Children Aged 3–5 Years With and Without Severe  
496 Early Childhood Caries in New Nyanza Provincial [Internet]. 2012. Available from:  
497 [http://erepository.uonbi.ac.ke/bitstream/handle/11295/8298/Wasunna \\_Nutritional Status](http://erepository.uonbi.ac.ke/bitstream/handle/11295/8298/Wasunna_Nutritional%20Status%20Of%20Children%20Aged%203%20-%205%20Years%20With%20And%20Without%20Severe%20Early%20Childhood%20Caries%20In%20New%20Nyanza%20Provincial%20General%20Hospital%20Kisumu%20Kenya.pdf)  
498 [Of Children Aged 3 – 5 Years With And Without Severe Early Childhood Caries In New](http://erepository.uonbi.ac.ke/bitstream/handle/11295/8298/Wasunna _Nutritional Status)  
499 [Nyanza Provincial General Hospital Kisumu Kenya.pdf](http://erepository.uonbi.ac.ke/bitstream/handle/11295/8298/Wasunna _Nutritional Status)
- 500 14. Filstrup SL, Briskie D, Da Fonseca M, Lawrence L, Wandera A, Inglehart MR. Early  
501 childhood caries and quality of life: Child and parent perspectives. *Pediatr Dent*.  
502 2003;25:431-40.
- 503 15. Dimaisip-Nabuab J, Duijster D, Benzian H, Heinrich-Weltzien R, Homsavath A, Monse  
504 B, et al. Nutritional status, dental caries and tooth eruption in children: A longitudinal  
505 study in Cambodia, Indonesia and Lao PDR *11 Medical and Health Sciences 1117 Public*  
506 *Health and Health Services 11 Medical and Health Sciences 1105 Dentistry. BMC Pediatr*.  
507 2018;18(1):300.
- 508 16. Mishu MP, Hobdell M, Khan MH, Hubbard RM, Sabbah W. Relationship between  
509 untreated dental caries and weight and height of 6- to 12-year-old primary school children  
510 in Bangladesh. *Int J Dent*. 2013;2013:1–5.

- 511 17. Cleaton- Jones MNKPE. Dental Caries in African Preschool Children: Social Factors as  
512 Disease Markers. *Public Heal Dent.* 1998;58(1):7–11.
- 513 18. Ghandor. Caries prevalence among 3-5 years old children in Khartoum. *J Indian Denatal*  
514 *Assoc JIDA.* 1992;163(10):415–7.
- 515 19. Kiwanuka N., Astrom A. AT. Dental caries experience and its relationship to social and  
516 behavioural factors among 3–5- year- old children in Uganda. *Int J Paediatr Dent.*  
517 2004;14:336–46.
- 518 20. Njoroge NW, Kemoli AM, Gatheche LW. Prevalence and pattern of early childhood  
519 caries among 3-5 year olds in Kiambaa, Kenya. *East Afr Med J.* 2010;87(3):134–7.
- 520 21. Rwakatema DS, Ng’ang’a PM. Early childhood caries in Moshi, Tanzania. *East Afr Med*  
521 *J.* 2010;87(7):304–10.
- 522 22. Bailleul FI, Lopes K, Souames M, Azoguy LS, Frelut M BL. Caries experience in a  
523 severely obese adolescent population. *Int J Paediatr Dent.* 2007;17(5):358–63.
- 524 23. Tanzania Food and Nutrition Centre. The United Republic of Tanzania Ministry of Health  
525 and Social Welfare: Tanzania National Nutrition Survey 2014. 2014.
- 526 24. The United Republic of Tanzania TF and NC. Tanzania National Nutrition Survey 2018.  
527 2019.
- 528 25. National Bureau of Statistics. 2012 Population and Housing Census. National Bureau of  
529 Statistics, The United Republic of Tanzania. Dar Es Salaam; 2012.
- 530 26. Mghasse NE, William F. Practices and Challenges in the Provision of Pre-Primary  
531 Education in Tanzania. *African Res Rev.* 2016;10(1):1.



- 532 27. Karjalainen S, Söderling E, Sewón L, Lapinleimu H, Simell O. A prospective study on  
533 sucrose consumption, visible plaque and caries in children from 3 to 6 years of age.  
534 Community Dent Oral Epidemiol. 2001;29:136–42.
- 535 28. Pine CM, Pitts NB, Nugent ZJ. British Association for the Study of Community Dentistry  
536 (BASCD) guidance on the statistical aspects of training and calibration of examiners for  
537 surveys of child dental health. A BASCD coordinated dental epidemiology programme  
538 quality standard. Community Dent Health. 1997;14(Suppl 1):18–29.
- 539 29. World Health Organization. Design of an oral health survey. In: Oral health surveys :  
540 basic methods. 2013.
- 541 30. World Health Organization 2006. WHO Child Growth Standards. 2006.
- 542 31. Wang Y. CH. Use of Percentiles and Z -Scores in Anthropometry. V. Handbook of  
543 Anthropometry: Physical Measures of Human Form in Health and Disease. New York: ©  
544 Springer Science+Business Media, LLC 2012; 2012. 29–48 p.
- 545 32. Petersen PE, Bourgeois D, Ogawa H E-DS and NC. Global burden of oral diseases. Bull  
546 World Heal Organ. 2005;83(9):661–9.
- 547 33. World Health Organization 2016. Regional Oral Health Strategy 2016 - 2025: Addressing  
548 Oral Diseases as part of Noncommunicable Diseases. Regional Committee for Africa.  
549 2016.
- 550 34. Musinguzi N, Kemoli A, Okullo I. Prevalence and Treatment Needs for Early Childhood  
551 Caries Among 3–5-Year-Old Children From a Rural Community in Uganda. Front Public  
552 Heal. 2019;7:1–7.

- 553 35. Nobile CG, Fortunato L, Bianco A, Pileggi C, Pavia M. Pattern and severity of early  
554 childhood caries in Southern Italy: A preschool-based cross-sectional study. *BMC Public*  
555 *Health*. 2014;14:206.
- 556 36. Baggio S, Abarca M, Bodenmann P, Gehri M, Madrid C. Early childhood caries in  
557 Switzerland: A marker of social inequalities. *BMC Oral Health*. 2015;15(1):1–9.
- 558 37. Gao SS, Zhang S, Mei ML, Lo ECM, Chu CH. Caries remineralisation and arresting  
559 effect in children by professionally applied fluoride treatment - a systematic review. *BMC*  
560 *Oral Health*. 2016;16:12.
- 561 38. Folayan MO, Arije O, El Tantawi M, Kolawole KA, Obiyan M, Arowolo O, et al.  
562 Association between early childhood caries and malnutrition in a sub-urban population in  
563 Nigeria. *BMC Pediatr*. 2019;19(1):19–21.
- 564 39. Tadakamadla SK, Tadakamadla J, Tibdewal H, Duraiswamy P, Kulkarni S. Dental caries  
565 in relation to socio-behavioral factors of 6-year-old school children of Udaipur district,  
566 India. *Dent Res J (Isfahan)*. 2012;9(6):681–687.
- 567 40. Mafuvadze BT, Mahachi L, Mafuvadze B. Dental caries and oral health practice among  
568 12 year old school children from low socio-economic status background in Zimbabwe.  
569 *Pan Afr Med J*. 2013;14:164.
- 570 41. Varenne B, Petersen PE, Ouattara S. Oral health status of children and adults in urban and  
571 rural areas of Burkina Faso, Africa. *Int Dent J*. 2004;54(2):83–9.
- 572 42. Kato H, Tanaka K, Shimizu K, Nagata C, Furukawa S, Arakawa M, et al. Parental  
573 occupations , educational levels , and income and prevalence of dental caries in 3-year-old

- 574 Japanese children. *Env Heal Prev Med.* 2017;22(80):1–7.
- 575 43. Singh S, Vijayakumar N, Priyadarshini HR, Shobha M. Prevalence of early childhood  
576 caries among 3-5 year old pre-schoolers in schools of Marathahalli, Bangalore. *Dent Res J*  
577 (Isfahan). 2012;9(6):710–714.
- 578 44. So M, Ellenikiotis YA, Husby HM, Paz CL, Seymour B, Sokal-Gutierrez K. Early  
579 childhood dental caries, mouth pain, and malnutrition in the ecuadorian amazon region.  
580 *Int J Environ Res Public Health.* 2017;14(550):1–12.
- 581 45. Alves LS, Susin C, Damé-Teixeira N, Maltz M. Overweight and obesity are not associated  
582 with dental caries among 12-year-old South Brazilian schoolchildren. *Community Dent*  
583 *Oral Epidemiol.* 2012;41(3):224–31.
- 584 46. Köksal E, Tekçiçek M, Yalçın SS, Tuğrul B, Yalçın S, Pekcan G. Association between  
585 anthropometric measurements and dental caries in Turkish school children. *Cent Eur J*  
586 *Public Health.* 2011;19(3):147–51.
- 587 47. Jamelli SR, Rodrigues CS, de Lira PIC. Nutritional status and prevalence of dental caries  
588 among 12-year-old children at public schools: A case-control study. *Oral Heal Prev Dent.*  
589 2010;8:77–84.
- 590 48. Gupta P, Gupta N, Pawar A, Birajdar S, Natt A, Singh H. Role of Sugar and Sugar  
591 Substitutes in Dental Caries: A Review. *ISRN Dent.* 2013;29:519421.
- 592 49. Maltz M, Jardim JJ, Alves LS. Health promotion and dental caries. *Braz Oral Res.*  
593 2010;24(Suppl. 1):18–25.
- 594 50. Sheiham A, Watt R. The common risk factor approach: a rational basis for promoting oral



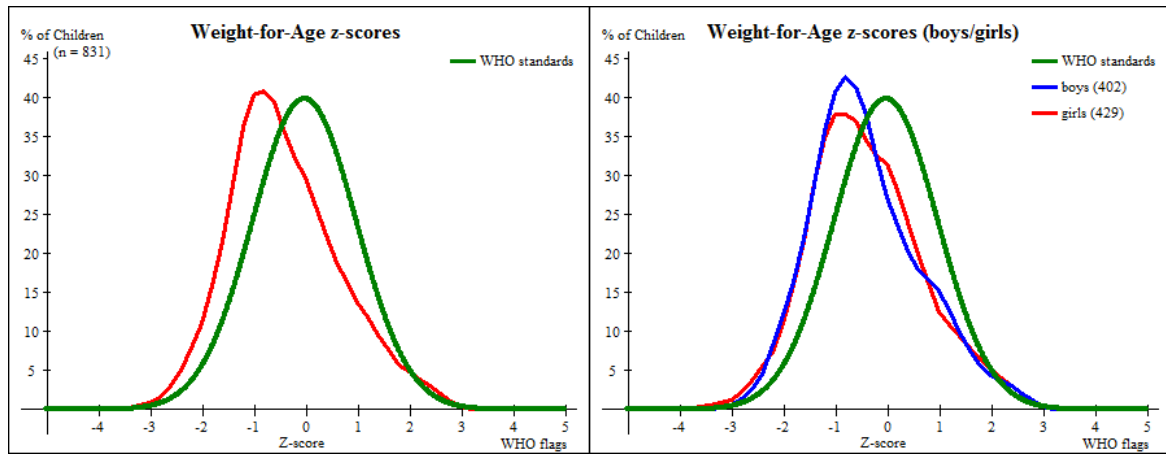

**Figure 1: Weight-for-Age z-score (WHO 2006)**

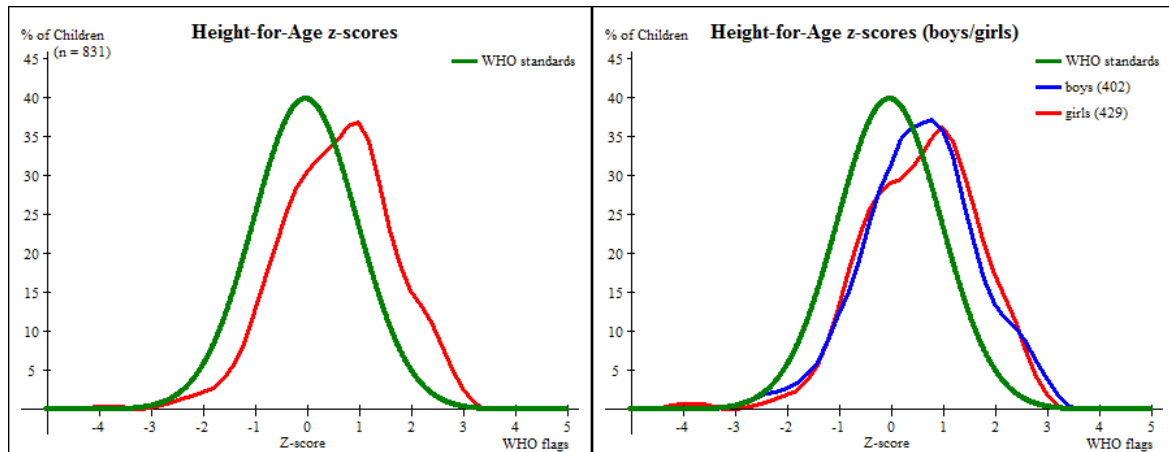

**Figure 2: Height-for-Age z-score (WHO 2006)**

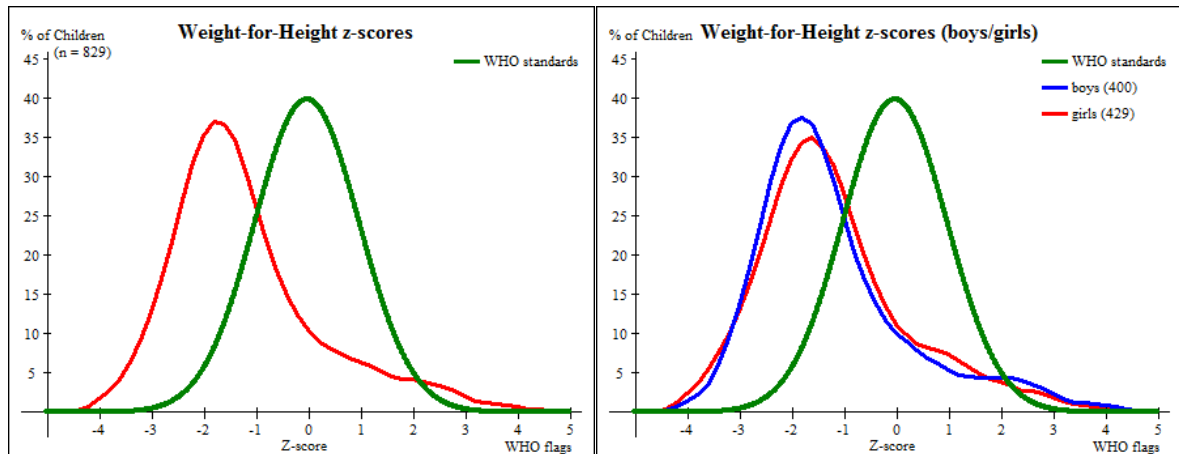

**Figure 3: Weight-for-Height z-score (WHO 2006)**
